# Supplementary material for: Involvement of condensin-directed gene associations in the organization and regulation of chromosome territories during the cell cycle
Source: PubMed Central journal article supplement — Nucleic Acids Res. 2015 Dec 23;44(8):3618–28. doi: 10.1093/nar/gkv1502 (PMC4856965; doi:10.1093/nar/gkv1502), 2015-12-23
Supplement: supp_gkv1502_nar-02945-h-2015-File008.pdf [file supp_gkv1502_nar-02945-h-2015-File008.pdf]

**Supplementary Information:  
Supplementary Figures**

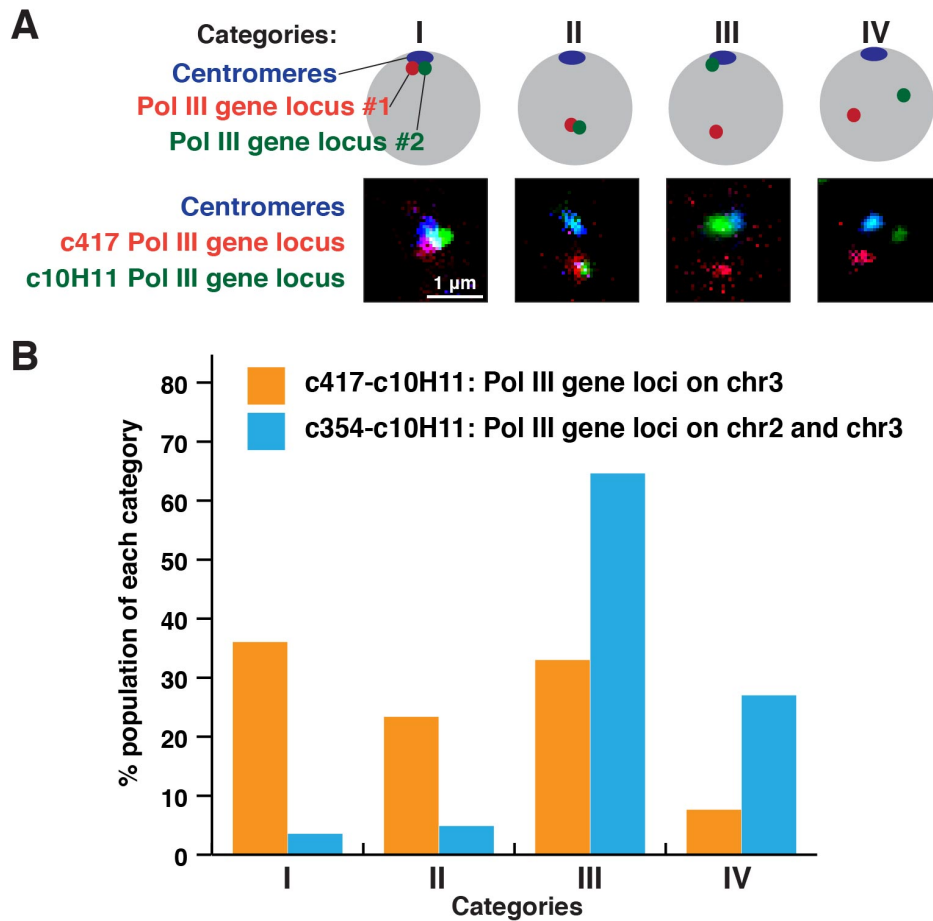

**Figure S1. Intra-chromosomal association between Pol III gene loci at/near and away from centromeres**

**(A)** Three-color FISH visualizing centromeres and the two Pol III gene loci (c417 and c10H11) present on the chromosome 3. Relative positioning of these loci was classified into the following four categories: Category I, proximal localization ( $< 0.3 \mu\text{m}$ ) of the Pol III gene loci near centromeres ( $< 0.3 \mu\text{m}$ ); II, proximal localization ( $< 0.3 \mu\text{m}$ ) of the Pol III gene loci away from centromeres ( $> 0.3 \mu\text{m}$ ); III, one of the Pol III gene loci locates near centromeres ( $< 0.3 \mu\text{m}$ ); IV all the loci are separated from one another ( $> 0.3 \mu\text{m}$ ). Representative images are shown at the bottom.

**(B)** FISH analysis on relative positioning of centromeres and the indicated Pol III gene loci.

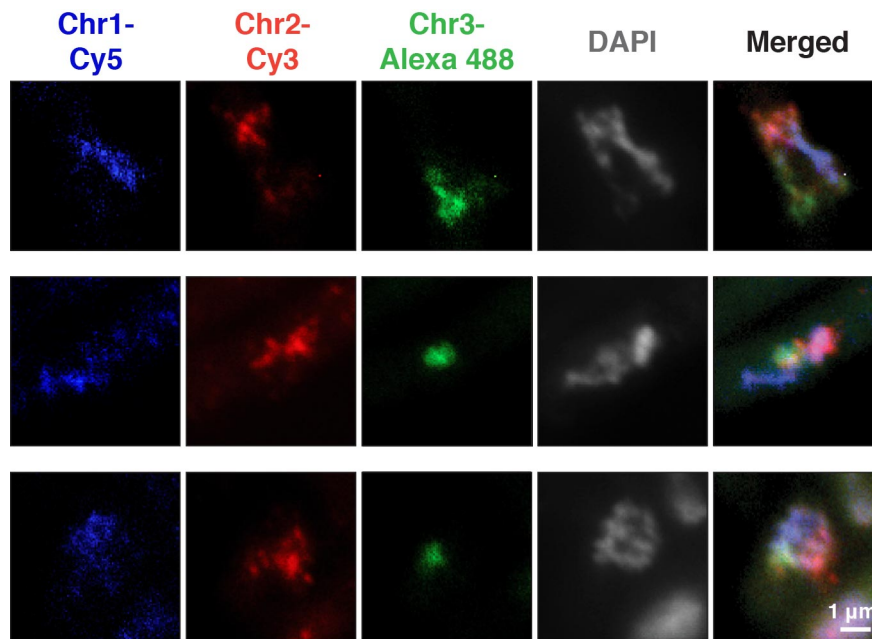

**Figure S2. Painting FISH for mitotic chromosomes**

**(A)** PFGE-derived FISH probes were used for chromosome painting. The *cdc25-22* mutant was cultured at the restrictive temperature (36°C) for 4 hours to arrest the cell cycle at the G2/M boundary and subsequently cultured at 25°C for 4 hours in medium containing 25 µg/ml CBZ, preparing prophase-arrested cells with heavily condensed chromosomes. Note that these chromosomes are much more compacted than those in mitotic cells without the treatment.

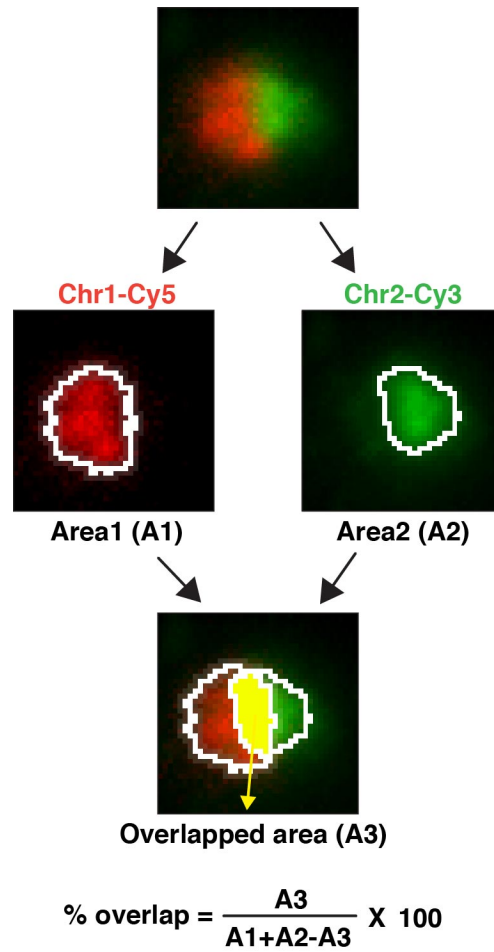

**Figure S3. Quantification of an overlap between different chromosomes**

FISH images were captured by a fluorescence microscope and analyzed by ImageJ software. A threshold that distinguishes chromosome-occupied areas (white lines) from background signals was determined by the Otsu method (1). As a result, the chromosome-occupied areas (A1 and A2) reflecting chromosome territories were estimated as numbers of square pixels. Areas A1 and A2 estimated by ImageJ and their overlapped area (A3) were used to calculate a percentage of the overlapped area in relation to the region covered by A1 and A2.

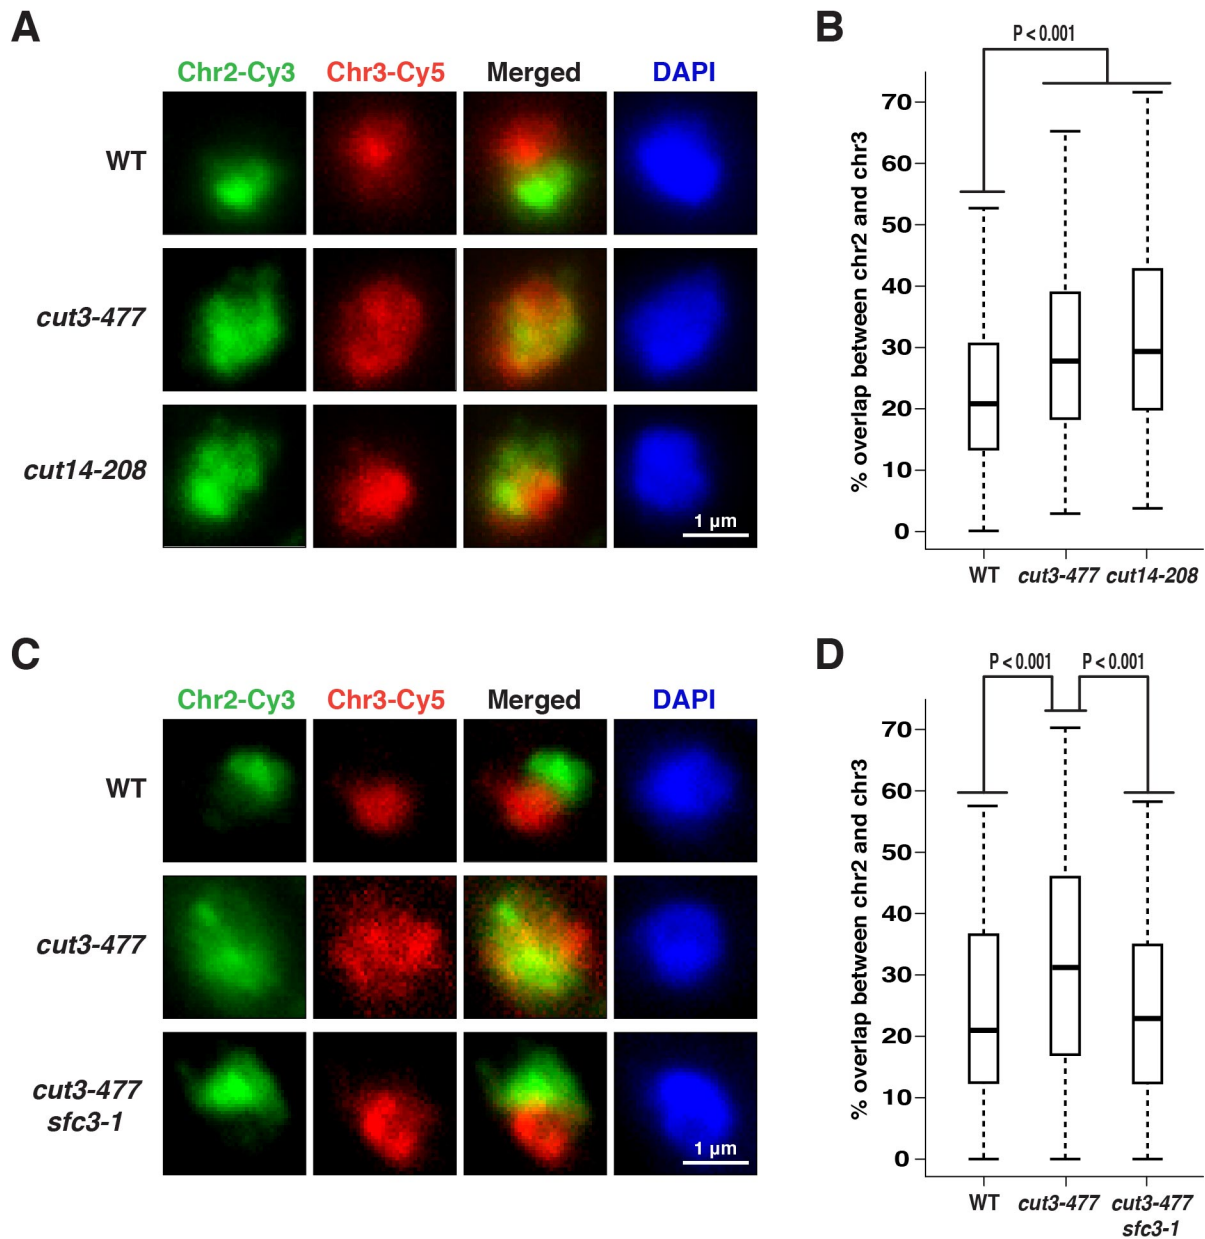

**Figure S4. Chromosomes 2 and 3 are significantly overlapped in condensin mutants**

**(A and B)** The wild type and condensin mutants were cultured as described in Fig. 2A. The chromosomes 2 (green) and 3 (red) were co-visualized using PFGE-derived FISH probes (A). The overlap between the chromosomes 2 and 3 was estimated in more than 100 cells as described in Fig. S3, and the data were represented as boxplots (B).

**(C and D)** The wild-type, *cut3-477*, and *cut3-477 sfc3-1* cells were subjected to the same analysis.

### Supplementary Reference

1. Otsu N (1979) A threshold selection method from gray-level histograms. *IEEE Trans. Sys., Man., Cyber*, **9**, 62-66.

**Table S1. PCR primers used to generate FISH probes against chromosome 1**

| Primer     | Sequence (5' to 3')           | Genomic position |
|------------|-------------------------------|------------------|
| Chr1_1_Fw  | CTTCATAATCATTAAATAAACCAACGG   | 62043            |
| Chr1_1_Rv  | ACTCATGCAAGTGGTCCAGATAACC     | 67007            |
| Chr1_2_Fw  | CGACCGACCAACGAATTGGCTGAATTG   | 151777           |
| Chr1_2_Rv  | GTATTCCACATGGCGTCTGTAACGCTG   | 156867           |
| Chr1_3_Fw  | CATCATCATTTTCGGTGTCTGCTGC     | 256964           |
| Chr1_3_Rv  | GAATTAAATGCCTCTAATAGAGCGTGC   | 262037           |
| Chr1_4_Fw  | ATTCAACGAGGTGTCAGTAAAGCAGGC   | 349595           |
| Chr1_4_Rv  | AGATAGATGATGAGCTCCTAGGCGTAG   | 354662           |
| Chr1_5_Fw  | GAATTCATCACTTCCAGAAGATGATG    | 457481           |
| Chr1_5_Rv  | TCGACGCAACCGCTGGTATGATACG     | 462842           |
| Chr1_6_Fw  | TCACCACCAATGAATCTGGCGAAAGGC   | 550751           |
| Chr1_6_Rv  | ACTGGAATAAATATATTCGGAAGGCTTGG | 555701           |
| Chr1_7_Fw  | TGCGGTGCAATCATAAAGATATTGTGC   | 643701           |
| Chr1_7_Rv  | TGTTTGACGATGGATCTTCTGAAGG     | 648711           |
| Chr1_8_Fw  | ATCAATGAGTTCGCCTCGTTATCAGC    | 744070           |
| Chr1_8_Rv  | ACTTGATAGTGGAGACGTTAAGGCGAG   | 749088           |
| Chr1_9_Fw  | CGATTCTAAGGTTGATTCCGCTTTGG    | 849963           |
| Chr1_9_Rv  | TCAGACCTTTAGGTGAAATAGCTCTC    | 854920           |
| Chr1_10_Fw | CCCACCATTTCATGCCATCTATTATCGG  | 957687           |
| Chr1_10_Rv | ATCCCTTAGCGGGTTTGATGATCTTG    | 962708           |
| Chr1_11_Fw | GCTGATGAGGAGCAAGTTGATCACAG    | 1042326          |
| Chr1_11_Rv | CATAGCATCACGAAGCTTTACAGTACC   | 1047478          |
| Chr1_12_Fw | TCCGAACTAGACACTTTAAGCGCAGCG   | 1151190          |
| Chr1_12_Rv | TACCCGTAATTAACAGATTTAGCAAGTC  | 1156234          |
| Chr1_13_Fw | AAGGTTAGAAAGAATAGGTTATTGGC    | 1238519          |
| Chr1_13_Rv | TATCATCATATCTGATATGGTAGCG     | 1243601          |
| Chr1_14_Fw | AAACTGCAATGTGGAGTTGGTGTGGC    | 1348463          |
| Chr1_14_Rv | CAGAGGTTAGCTCGCCTTTAGCAGAAC   | 1353463          |
| Chr1_15_Fw | TCTTCAGTCTGGGTAATAAACGTTGC    | 1458281          |
| Chr1_15_Rv | CAATATTCGAGTCGCAGAGTTAACTGG   | 1463457          |
| Chr1_16_Fw | TCCGCTGTCTGCATCTTGTGTACCTAG   | 1557297          |
| Chr1_16_Rv | AACCTATCGATGGCGGAATATTGTACG   | 1562235          |
| Chr1_17_Fw | ATGGAATAGCTCCAGTACTGCTAATGG   | 1650562          |
| Chr1_17_Rv | ATAATCCACGGCTCTTATGTCAACTGG   | 1655572          |
| Chr1_18_Fw | CAGTAATATCTCTTGAATGCGGAGGGG   | 1754198          |
| Chr1_18_Rv | GTTTTGGCGGTATCATCATACGCTGAG   | 1759175          |

|            |                                |         |
|------------|--------------------------------|---------|
| Chr1_19_Fw | GCGTAGCTAACGTAGTGGTAAATCC      | 1858146 |
| Chr1_19_Rv | TCGGCTAGATATCTTTATGACTACG      | 1863228 |
| Chr1_20_Fw | TGCAGTGATACGCCGAATTCCTTACC     | 1963319 |
| Chr1_20_Rv | TGATAGAACGGCTAACATACTCAGAGC    | 1968561 |
| Chr1_21_Fw | AGCTGATGACTGAACAAGCCTTTGTCTG   | 2055392 |
| Chr1_21_Rv | GAGTACTGCAAACCGTCCATCAAGC      | 2060709 |
| Chr1_22_Fw | TACCAAGTACGATCTTGTCTGCTCACTC   | 2158102 |
| Chr1_22_Rv | CAGATAGTCCCTCGAAGGCACTTTGATC   | 2163194 |
| Chr1_23_Fw | CAGCTTGCAACCTTCGGTTTTATTGC     | 2250701 |
| Chr1_23_Rv | GTTGAGGATCTCATCCTTGATCATACC    | 2256165 |
| Chr1_24_Fw | GATGAATAGAGCTGAGTATGACCCAGC    | 2355936 |
| Chr1_24_Rv | TGGATGTTGGTTGTAATCGAACCTTG     | 2361092 |
| Chr1_25_Fw | CCAGACAATAATACATGGAAGCAC       | 2452437 |
| Chr1_25_Rv | AAATAGCGTTGTAGTCATGTAATAACC    | 2457479 |
| Chr1_26_Fw | ACTTGCCTACTGTTTCAACATCTCAGC    | 2545242 |
| Chr1_26_Rv | TGGCGGATTATCAACATAGTTCGCAGC    | 2550733 |
| Chr1_27_Fw | CACACATTGGCATATGATAAAGGATGG    | 2655091 |
| Chr1_27_Rv | ACTTTAATGAGCATTCTCGAGCCGTAC    | 2660199 |
| Chr1_28_Fw | AACTATGCAGAGTTCGGCATAAGCTGG    | 2751732 |
| Chr1_28_Rv | AAGTTTCCCGATTATGAAATTGTTGATGAT | 2756298 |
| Chr1_29_Fw | GTGGTATTGATGACATCTGTTGTATGG    | 2861790 |
| Chr1_29_Rv | GCTTTGGCCGCTGTTAATGTAATTGC     | 2867068 |
| Chr1_30_Fw | CTGTTGAAGTAGTTGAACCTGCTGCTG    | 2945066 |
| Chr1_30_Rv | CTTGGTTATGGTTCATGGCGCTTATGC    | 2950349 |
| Chr1_31_Fw | GGTACTCTTGCTCAGCTACCCTACTC     | 3065468 |
| Chr1_31_Rv | AGATCCTTGTTGCTGGTACTTCTGC      | 3070473 |
| Chr1_32_Fw | AGTGTAGCATTTCGTTTCTACGGCCTTG   | 3151159 |
| Chr1_32_Rv | TGGCTTTGTTGTCATTGCGTACAACCTC   | 3156173 |
| Chr1_33_Fw | ACTGTCTCTCGTAATGAACTAATGACC    | 3256274 |
| Chr1_33_Rv | TCATACGTTGGGTATCTTATTTGTTGC    | 3261344 |
| Chr1_34_Fw | TTGGATTGGAGGATTTTCGCTAGCCACG   | 3356535 |
| Chr1_34_Rv | ATGGTTCGTCCTCGTCAGTTATTGTTT    | 3360619 |
| Chr1_35_Fw | GAGGTTGCCGAGATTCATAGTCTTC      | 3450767 |
| Chr1_35_Rv | AATGTCCCAATTTCTACGCCAAATAC     | 3455899 |
| Chr1_36_Fw | GCGCGCTAGCATCTAAACATTACAGCG    | 3549178 |
| Chr1_36_Rv | GCTACCGACTCTCTCGATATTTCTCAC    | 3554204 |
| Chr1_37_Fw | CAGAGTTAAAGTATAAACACTATGCC     | 3653567 |
| Chr1_37_Rv | CTAGCATCAAAGATTCAGGATTTGC      | 3658634 |
| Chr1_38_Fw | AGTGCAGTGTTCACCAACAAGCGTACG    | 3790442 |
| Chr1_38_Rv | TTAGCCTAACCTGTTAGATATGCGGTG    | 3795574 |
| Chr1_39_Fw | CGAATTGTCGAAGAAATTGCTACTGAC    | 3858498 |

|            |                              |         |
|------------|------------------------------|---------|
| Chr1_39_Rv | AGATATTCGTTTGCTGATCGCAATAGC  | 3863406 |
| Chr1_40_Fw | ATACACATTCTTCCCGAGCAAGACAGC  | 3954697 |
| Chr1_40_Rv | ATACTGCTAGAAGCAGATGAGCTGAGG  | 3959962 |
| Chr1_41_Fw | GTCAAAGCCGATATTGATATGCTGTCC  | 4073855 |
| Chr1_41_Rv | GTAGCACTCTTTCTATGACTACTTCTC  | 4079116 |
| Chr1_42_Fw | TGATATAGGCATGCGTTCGACTCATGC  | 4154882 |
| Chr1_42_Rv | TTGGTTGCACCTACAGGAATCATACTC  | 4160119 |
| Chr1_43_Fw | GCATCACAAGCTTTACGCTTGATG     | 4259702 |
| Chr1_43_Rv | CCACATTGAAAGTTGTCAGGTATG     | 4264779 |
| Chr1_44_Fw | AATACCGGCGTGTTAGATTTAGCACCC  | 4349027 |
| Chr1_44_Rv | TTACCGGAGGAACTTCCTTAATACCTG  | 4354073 |
| Chr1_45_Fw | AAGGTTTACTGCTTTGTCAAACCTTAGC | 4446028 |
| Chr1_45_Rv | TTCATAGTTTTCGATAGCATCCTGTGC  | 4451584 |
| Chr1_46_Fw | GATAATTACAACAATCTGTCCGGCCGG  | 4514696 |
| Chr1_46_Rv | TCTCACTAACCATTCTTGTAGAGCAG   | 4519682 |
| Chr1_47_Fw | GATTTGTGTGACGAAGAATCTATGAGG  | 4660933 |
| Chr1_47_Rv | AAACGAAGGACGAGTCAAGGCATC     | 4665989 |
| Chr1_48_Fw | TTGCGACATTCAGCGTACGTGCTTCAC  | 4744677 |
| Chr1_48_Rv | AGGCCGTTGTCAATCTATGGTTCTACC  | 4749718 |
| Chr1_49_Fw | AGTTGAACGGATACGTTGGATTTCG    | 4853334 |
| Chr1_49_Rv | ACCTTGAATTATATCCCAGTACTGC    | 4858392 |
| Chr1_50_Fw | CTACGAAGAACGAGGATCGGTTGATTG  | 4958822 |
| Chr1_50_Rv | TAAGTTAGGTGATTAGAACTTCAATCGG | 4963838 |
| Chr1_51_Fw | TTCGCCTCCAGCCATATAATCTGTCAC  | 5047459 |
| Chr1_51_Rv | GCTTTGTATTGTCAATTAACAGTCTTG  | 5052590 |
| Chr1_52_Fw | CCAATATCGCTGGATCGAGGATTGTTT  | 5140345 |
| Chr1_52_Rv | TTGTTGGTCATGAAGACTGGTTGCTTC  | 5145057 |
| Chr1_53_Fw | TCAGAAGCATACTGGTTTGCTGAAGC   | 5249674 |
| Chr1_53_Rv | AATGGCATGCATCATTCCAAGGCCAAC  | 5254666 |
| Chr1_54_Fw | GCGTTGCTTAGAGAAGTCCCAATTGC   | 5346346 |
| Chr1_54_Rv | AGACTACATCTACTTCTGAAGCTCCAC  | 5351507 |
| Chr1_55_Fw | GCGACTGCATGCTACGTATTTATC     | 5451794 |
| Chr1_55_Rv | AAGCTAAAGATCATGTCTACGTTTCG   | 5456929 |
| Chr1_56_Fw | GGCAAGTTATGCAGAACTTATCGCAGC  | 5510095 |
| Chr1_56_Rv | ACTGCATCCACATAATTCATGGGTTTCG | 5514678 |



**Table S2. PCR primers used to generate FISH probes against chromosome 2**

| <b>Primer</b> | <b>Sequence (5' to 3')</b>   | <b>Genomic position</b> |
|---------------|------------------------------|-------------------------|
| Chr2_1_Fw     | TTAAGAATAGCGAACATCGCACTTTG   | 47021                   |
| Chr2_1_Rv     | GGTGTCTGAATAAGTAGAATAGTACTCC | 52157                   |
| Chr2_2_Fw     | TCTTCAGAATCCTTTGCATCTGCTGGC  | 159133                  |
| Chr2_2_Rv     | TATTGGTTCACCAGCTTGTACCTAACG  | 164150                  |
| Chr2_3_Fw     | AGTTTTGAAAAGTCGAACGACCTCC    | 237447                  |
| Chr2_3_Rv     | AATTGGTGATCGTGTTCTGCTGATC    | 242635                  |
| Chr2_4_Fw     | CCATTTCAAGCTTGC GTTCTCCGATTC | 340435                  |
| Chr2_4_Rv     | TGGGAACATATGAGCATGTGAAGTCTC  | 345431                  |
| Chr2_5_Fw     | ATTTCCAGTCCGAATTGCTTCCAAGT   | 440384                  |
| Chr2_5_Rv     | ACCAACGTTACCGTCTACTACTAGAC   | 445440                  |
| Chr2_6_Fw     | CCGTATGATTCTAGCGAAGCATAGGCC  | 538663                  |
| Chr2_6_Rv     | GTTCAAGTAATTGAGCCCTCAGCTTGG  | 543710                  |
| Chr2_7_Fw     | AAGATCTGTCATAAGACAATCGTTCAG  | 640452                  |
| Chr2_7_Rv     | TGCATTGCTATTCAGACTATTGGAAGG  | 645450                  |
| Chr2_8_Fw     | GCGCCCTTATAGTTCACCCAATTAGAG  | 734105                  |
| Chr2_8_Rv     | TGGGTAGGTGTTCTTCACATTGGAGAG  | 739188                  |
| Chr2_9_Fw     | GCAGCCTGGTTCTATTGAATATTTCTCC | 851494                  |
| Chr2_9_Rv     | TTGTAGTCTGCTGTAAAATGGACAAGC  | 856580                  |
| Chr2_10_Fw    | CCGTAAGTGGACTGCTGGAATTTCTTC  | 949010                  |
| Chr2_10_Rv    | TGTGCTTTACGGAGTTGCTAGTACAGC  | 954163                  |
| Chr2_11_Fw    | AGTACCTGACTTCATCCTATCGAAGC   | 1036988                 |
| Chr2_11_Rv    | TGGTGTAAATCGATTTGCACTCCACC   | 1042045                 |
| Chr2_12_Fw    | AGCAAGAATTCCCAGAACGCTTCTCAG  | 1126673                 |
| Chr2_12_Rv    | ACTATGAGTCTCGTGGATCAGTTGAAG  | 1131673                 |
| Chr2_13_Fw    | TGCGTACCAATACTTGAATGCATCTGC  | 1246273                 |
| Chr2_13_Rv    | TTGAATTACGATAGACACGACTCTGC   | 1251528                 |
| Chr2_14_Fw    | GTACGAAACAGAGCTACTTGTACTGCG  | 1323892                 |
| Chr2_14_Rv    | AGGTTCTGAAGCATCTGATGAGATCTC  | 1329134                 |
| Chr2_15_Fw    | TTAACCTGTCTTACAGCTTTTGGCTGG  | 1444428                 |
| Chr2_15_Rv    | TATATCTCCAGGCATGAAACATTACC   | 1449597                 |
| Chr2_16_Fw    | TGCGAGGTAGCATTGTTGGAGATTGTG  | 1556115                 |
| Chr2_16_Rv    | TACCGTCCATGTTTCGATCATTTGGAC  | 1561130                 |
| Chr2_17_Fw    | ATTTACAAGTCGCGGAGTAAGCGAAG   | 1655329                 |
| Chr2_17_Rv    | AGAAGTCTAATTCTTCTGAGAATGG    | 1660351                 |
| Chr2_18_Fw    | TACGGCCTTATCTTCTCCAACATCCTC  | 1756844                 |
| Chr2_18_Rv    | TGATAATGCAATAGTGCACGCGATGTG  | 1761842                 |
| Chr2_19_Fw    | TATGTCTTCTGACTTTCCCTGAAGAGC  | 1848824                 |
| Chr2_19_Rv    | CAAGACAGATTCTTCTATTCAAGCTGC  | 1853853                 |
| Chr2_20_Fw    | CGAGTGAGTTACAAACACGGTTGGTTG  | 1945117                 |

|            |                                   |         |
|------------|-----------------------------------|---------|
| Chr2_20_Rv | TAGAGATGTTATGGGCAATCCCGTTCC       | 1950142 |
| Chr2_21_Fw | TCTAAGACACGACGTGTAAGAAATTGG       | 2057358 |
| Chr2_21_Rv | GACTGATCTTATCAAGCCGCTAAGACC       | 2062544 |
| Chr2_22_Fw | TTACAGCCATGATTGACTGATGCCACG       | 2150728 |
| Chr2_22_Rv | TTCATAAAGCTTTGAGCATAACGGGTC       | 2155758 |
| Chr2_23_Fw | CAACCTCATTGCTTTAAGCCAGACTGC       | 2266120 |
| Chr2_23_Rv | ACTTGCCATCTGATGGTGCTCAAGTTG       | 2271266 |
| Chr2_24_Fw | ATTCTGACCAGCACAGTGGAAATGGAAG      | 2348264 |
| Chr2_24_Rv | TGCTGAATTTGAGCAACTTACTCCTCC       | 2353244 |
| Chr2_25_Fw | TCGATGGACCTGGAGCTCTAAATCACG       | 2446861 |
| Chr2_25_Rv | GTGCTAGAGGACTATGACCTGGTATGC       | 2451829 |
| Chr2_26_Fw | TCGGATTAAGTGGCTTCAATGCCTCTC       | 2553046 |
| Chr2_26_Rv | ATATTCATACCGTCGATGGGTTTCAGG       | 2558026 |
| Chr2_27_Fw | GACAGATCCAAGGTTTCGTAAACGACG       | 2649154 |
| Chr2_27_Rv | TGCAAGGTTGGAAAGTGACTCCTTGC        | 2654200 |
| Chr2_28_Fw | CGGCTTGTTGATTACCGTAATCGGTAC       | 2748823 |
| Chr2_28_Rv | AGACAGCATCTTTGTACATTTGCTGCC       | 2753813 |
| Chr2_29_Fw | TCGGAGCTGTAGTGTAGCAAACCTCGC       | 2835205 |
| Chr2_29_Rv | CGATTTGCAATGATGGCTTCTCAACC        | 2840283 |
| Chr2_30_Fw | TTCTGAGCGATACGTTGGTACACGTAG       | 2925445 |
| Chr2_30_Rv | CGTGACCAGTGGGAATTTGCCTAAAG        | 2930507 |
| Chr2_31_Fw | ACTTGTGTAGGCGCAAACCTTCTGAGCC      | 3043933 |
| Chr2_31_Rv | AGTGTATTAGCAGTCGAAGAACTGAGG       | 3048929 |
| Chr2_32_Fw | AACCGACTCTATAATCGTACGGCTTGC       | 3139684 |
| Chr2_32_Rv | AGTCTTCAAGGAAGAAACGTCTCCTC        | 3144721 |
| Chr2_33_Fw | AAGGCTACGTGAATAGTGAGCGCTTGG       | 3246384 |
| Chr2_33_Rv | AGTAGGTCATTTGTAATGGATTCCGC        | 3251244 |
| Chr2_34_Fw | CAGGTAATCATTAGTTTGGCGGTACC        | 3345724 |
| Chr2_34_Rv | AGTAATTAGTTATACATGAAGCTATTATAGACC | 3350576 |
| Chr2_35_Fw | GAAATTCGCTGTCGCGTTATCACAAGC       | 3434859 |
| Chr2_35_Rv | GGTAACTTAACTTCCCTTGC GCGATAC      | 3439842 |
| Chr2_36_Fw | TGATTGGTATTGCCGTGTGTGAATGCC       | 3531372 |
| Chr2_36_Rv | AGGTCTTCTTAGGGATAATTGCTTCGG       | 3536427 |
| Chr2_37_Fw | ACAGTGGTGTAAACCTCCAAATGATGG       | 3644064 |
| Chr2_37_Rv | TTGTCCGACTTACTTGTCTCACTTAGG       | 3649022 |
| Chr2_38_Fw | CACCCTGTATGCAATCTATAGTGCCCG       | 3745207 |
| Chr2_38_Rv | TGAGGCAGTGCATAATAATTGCACTGG       | 3750237 |
| Chr2_39_Fw | AGGAATACGTTAGCTGCTCGTGGATGC       | 3841275 |
| Chr2_39_Rv | TCAGACTCAAATGGCAAAGCTGTCAGC       | 3846294 |
| Chr2_40_Fw | CATCATCAGCTGACCTTTCAACCCTTC       | 3939641 |
| Chr2_40_Rv | ACACTAGCAAACCTGCCACTTTAGAAGC      | 3945057 |

|            |                             |         |
|------------|-----------------------------|---------|
| Chr2_41_Fw | ATCGAGATCTTGACTACCGAAGGTCCG | 4048827 |
| Chr2_41_Rv | GACAAAGCTTCTAACGCCAGAGCCATC | 4053887 |
| Chr2_42_Fw | TTTCTACAGAACACCTAAGACGGTCGG | 4144593 |
| Chr2_42_Rv | GCAACTTCCATGGCCTCTAGGTTACAC | 4149278 |
| Chr2_43_Fw | TTGCACATGTAATGGCGTCTAACGGTC | 4243052 |
| Chr2_43_Rv | ACAGTTACCGAACATAACTCAGGCACG | 4243394 |
| Chr2_44_Fw | TCCAGTCTACGAATCCAACTTCTGGG  | 4248106 |
| Chr2_44_Rv | TTCTAACGAAAGTGCTACCGCAATTGC | 4248417 |
| Chr2_45_Fw | GCCTTAGCGTTGATGAATGGACGAGAC | 4348915 |
| Chr2_45_Rv | TGAAATTATTCAGGCTTGGTCAACCCG | 4353959 |
| Chr2_46_Fw | GCTTCCTGAAACAAAGGGTCGTGATGC | 4445847 |
| Chr2_46_Rv | AAATCCAGCTCCAGACATATCAACTCC | 4450785 |

**Table S3. Fission yeast strains used in this study**

| Strain | Genotype                                                                         |
|--------|----------------------------------------------------------------------------------|
| SP1173 | <i>h<sup>-</sup> leu1-32 ade6-M216 his2 ura4-D18</i>                             |
| SPO25  | <i>h<sup>-</sup> leu1-32 ade6-M210 his2 ura4-D18 cut3-477</i>                    |
| SPO279 | <i>h<sup>-</sup> leu1-32 ade6-M216 ura4-D18 cut14-208</i>                        |
| SPO22  | <i>h<sup>-</sup> leu1-32 ade6-M210 his2 ura4 cut3-477 sfc3-1</i>                 |
| SPO155 | <i>h<sup>-</sup> leu1-32 ade6-M216 his2 ura4-D18 cdc25-22</i>                    |
| SPO41  | <i>h<sup>+</sup> leu1-32 ade6-M210 ura4 c162::ura4<sup>+</sup></i>               |
| SPO43  | <i>h<sup>+</sup> leu1-32 ade6-M210 ura4 c162:: ura4<sup>+</sup>-tRNA-5S rRNA</i> |
